# Supplementary material for: Microarray Profiling of Vaccination-Induced Antibody Responses to SARS-CoV-2 Variants of Interest and Concern
Source: MDPI journal article supplement (doi:10.3390/ijms232113220), 2022-10-30

**Table S1.** Detailed information on serum samples tested in this study.

| <b>Patient group</b>          |                |             |
|-------------------------------|----------------|-------------|
|                               |                | <b>n=22</b> |
| Gender                        | Male           | 12          |
|                               | Female         | 10          |
| Median age (years)            |                | 59.0        |
| Severity                      | Mild cases     | 14          |
|                               | Moderate cases | 6           |
|                               | Hard cases     | 2           |
| <b>Sputnik V group</b>        |                |             |
|                               |                | <b>n=31</b> |
| Gender                        | Male           | 16          |
|                               | Female         | 15          |
| Median age (years)            |                | 38.4        |
| <b>CoviVac group</b>          |                |             |
|                               |                | <b>n=30</b> |
| Gender                        | Male           | 5           |
|                               | Female         | 25          |
| Age (years)                   |                |             |
| <b>Control group</b>          |                |             |
|                               |                | <b>n=31</b> |
| Sample collection data (year) |                | 2018        |

**Figure S1.** Examples of the array scans

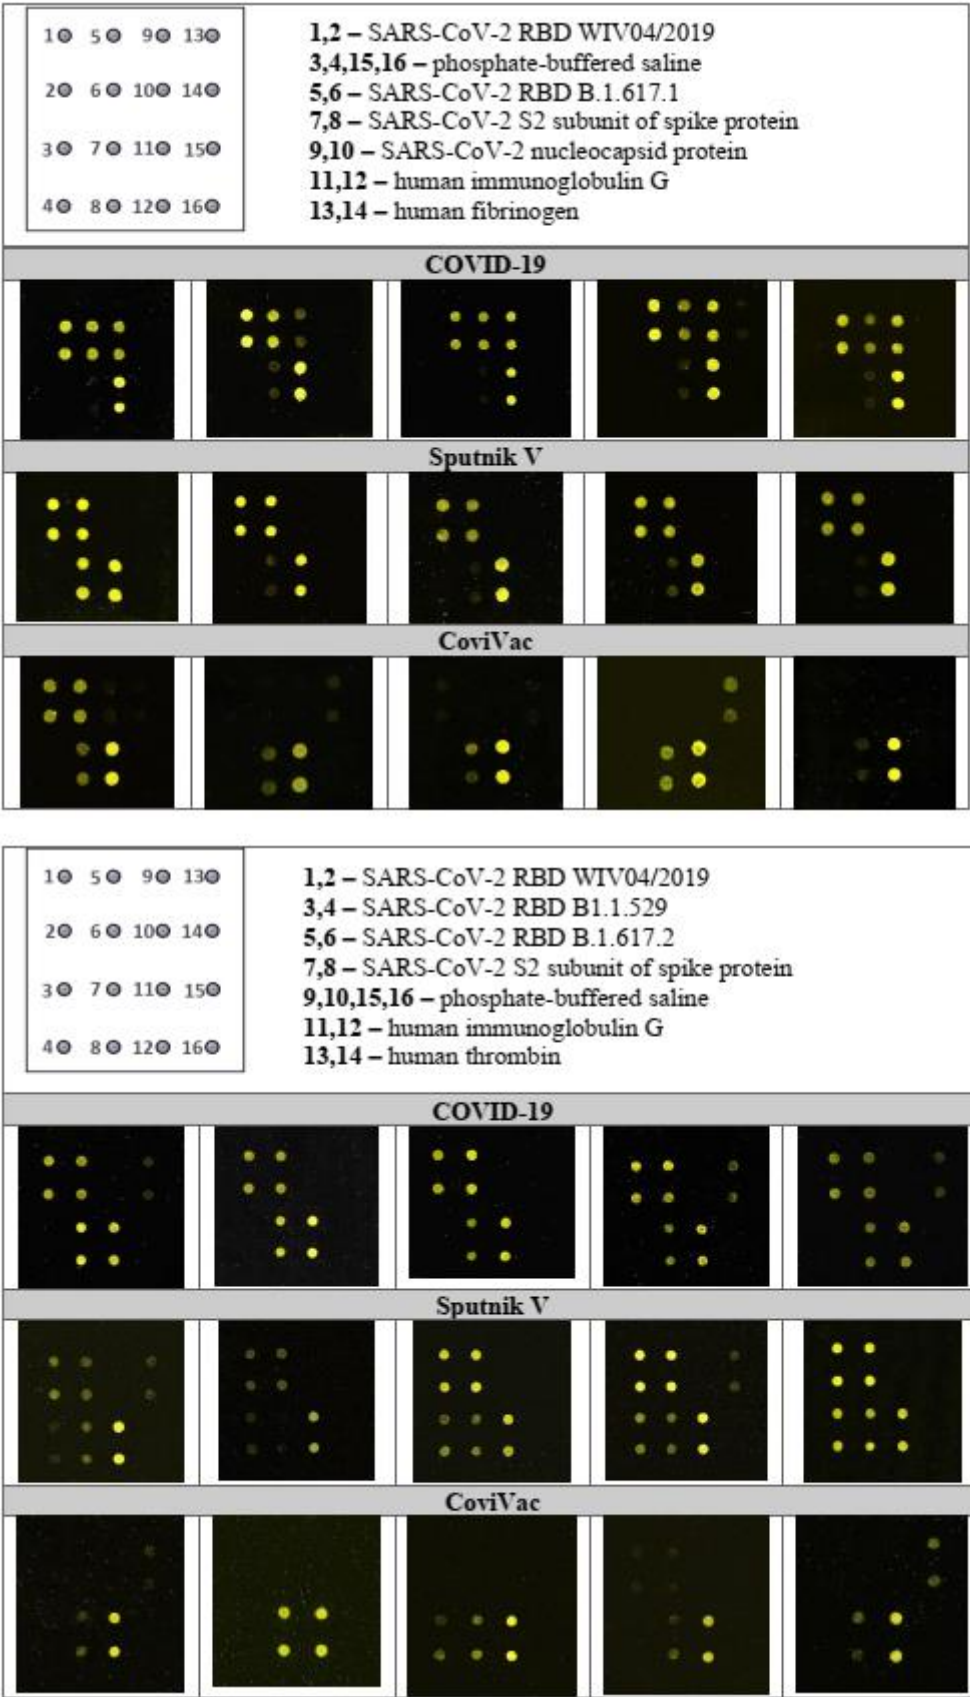

**Table S2.** Sensitivity, selectivity and accuracy for microarray method

|                        | <b>RBD</b> | <b>S2</b> | <b>N</b> |
|------------------------|------------|-----------|----------|
| <b>COVID-19 (n=60)</b> |            |           |          |
| <b>True Positives</b>  | 29         | 29        | 30       |
| <b>False Positives</b> | 1          | 1         | 2        |
| <b>True Negatives</b>  | 26         | 27        | 25       |
| <b>False Negatives</b> | 4          | 3         | 3        |
| <b>Sensitivity</b>     | 0.89       | 0.84      | 0.90     |
| <b>Specificity</b>     | 0.95       | 0.98      | 0.98     |
| <b>AUC</b>             | 0.96       | 0.93      | 0.97     |

**Figure S2.** The sequence alignment of the SARS-Cov-2 S protein and human fibrinogen (Chain A)

I – Identity; S - Similarity

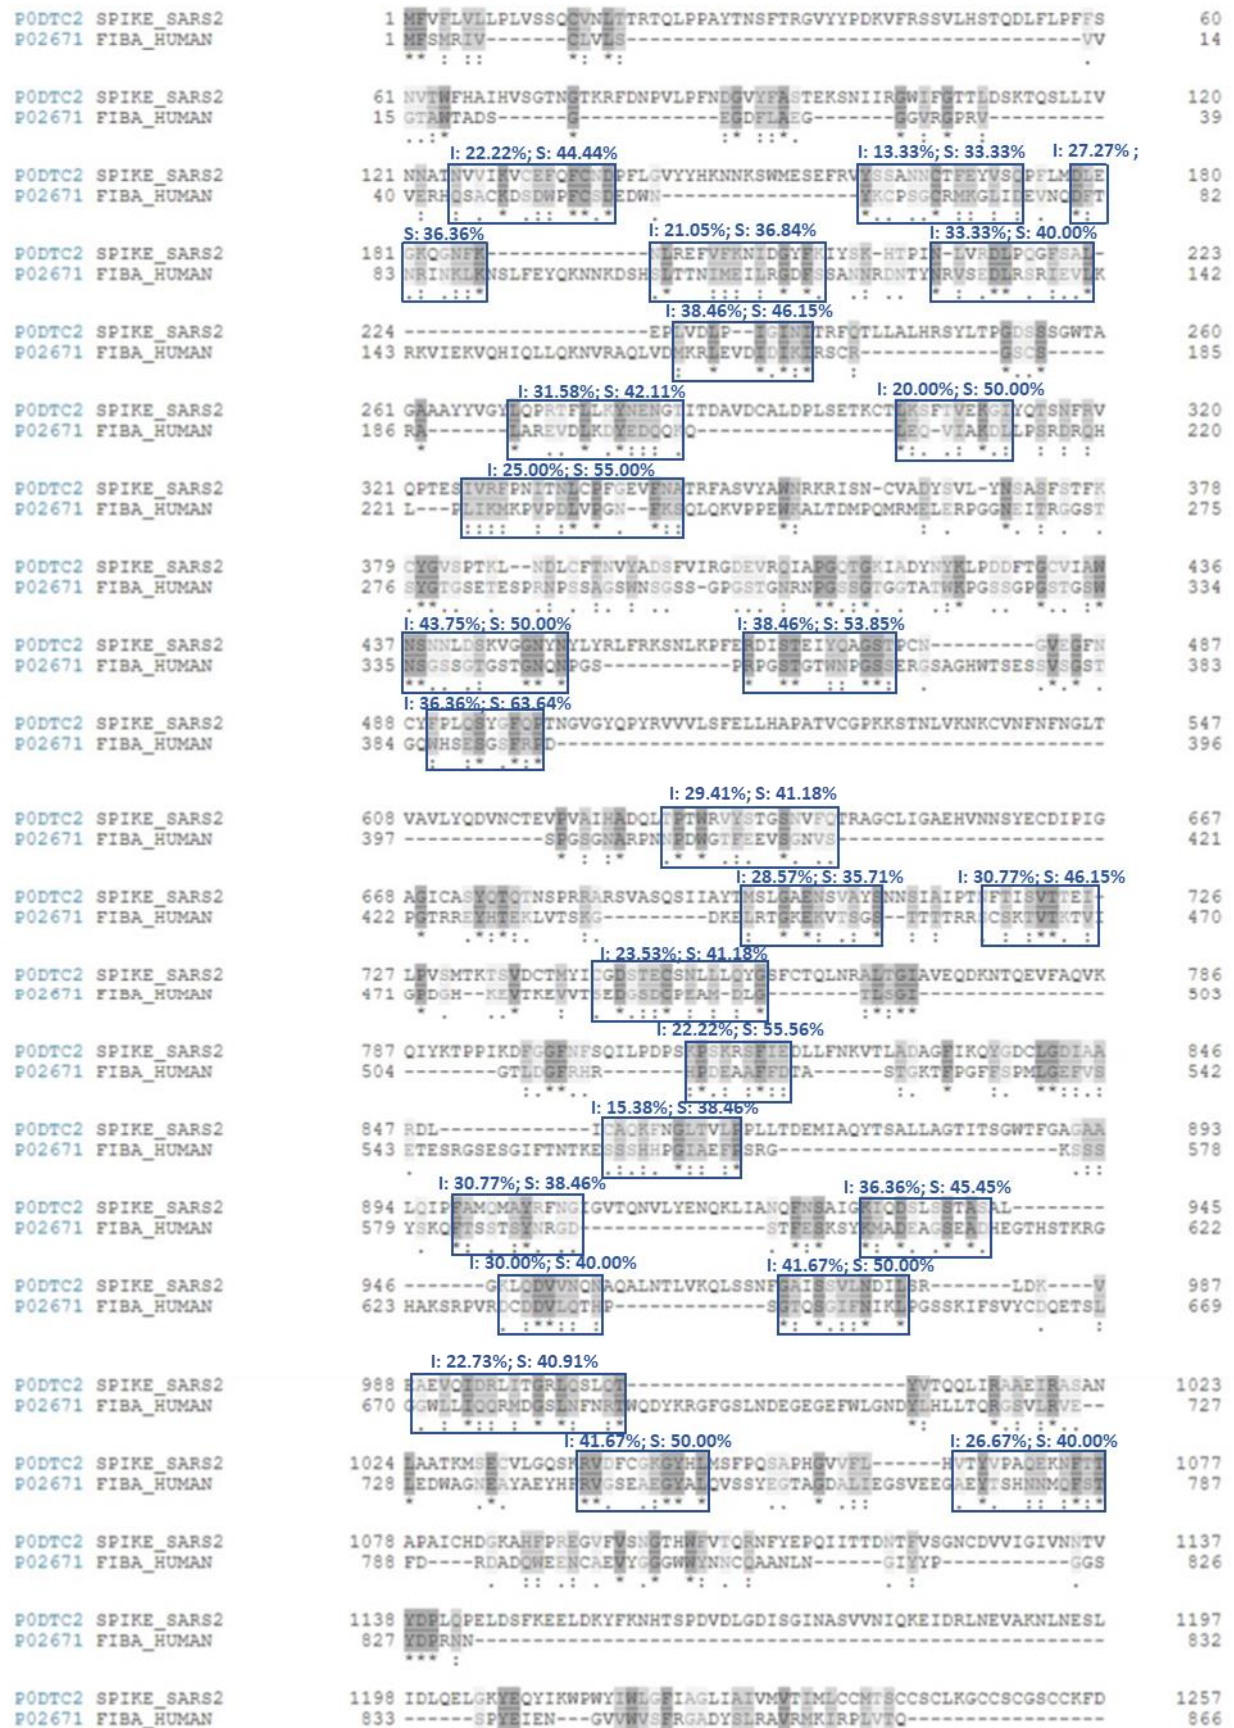





**Figure S4.** The sequence alignment of the SARS-Cov-2 S protein and human fibrinogen (Chain G)

I – Identity; S - Similarity

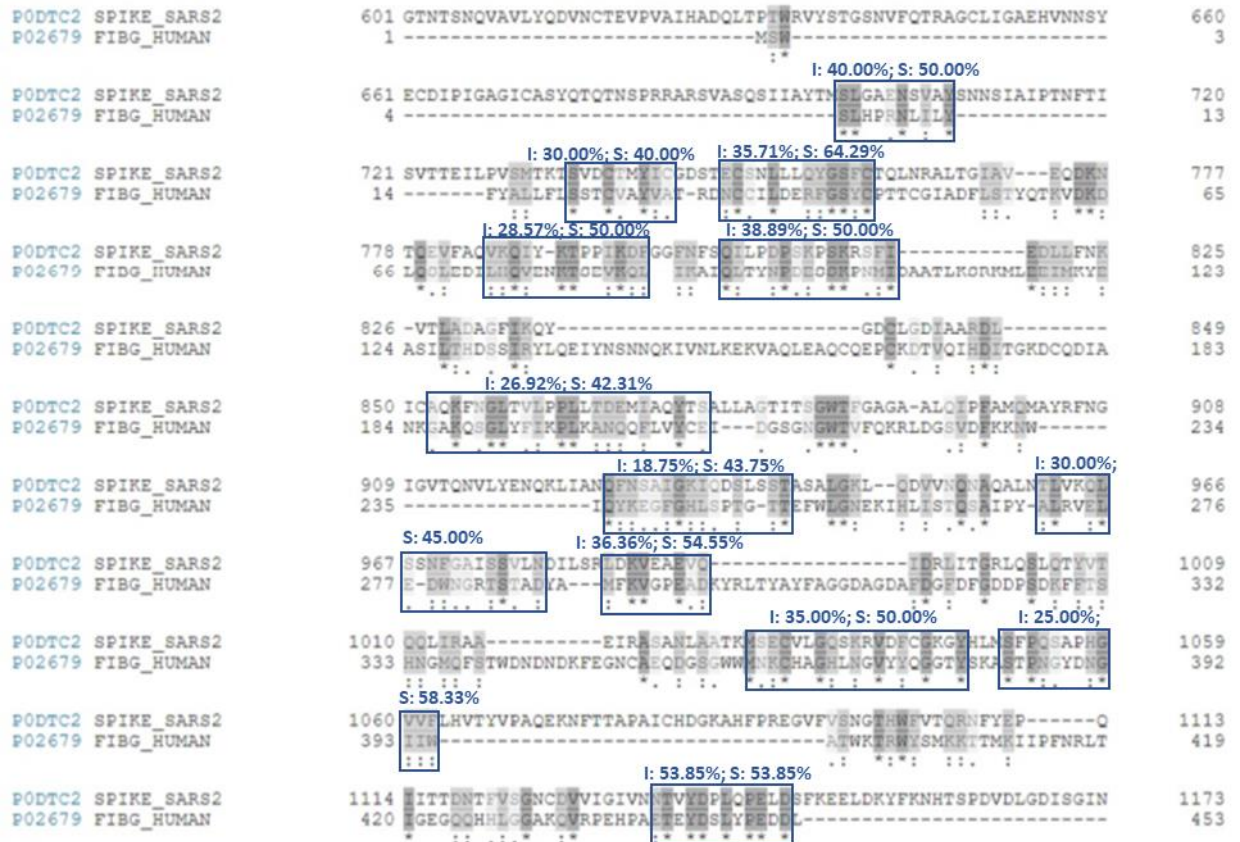

**Figure S5.** The sequence alignment of the SARS-Cov-2 N protein and human fibrinogen (Chain A)

I – Identity; S - Similarity

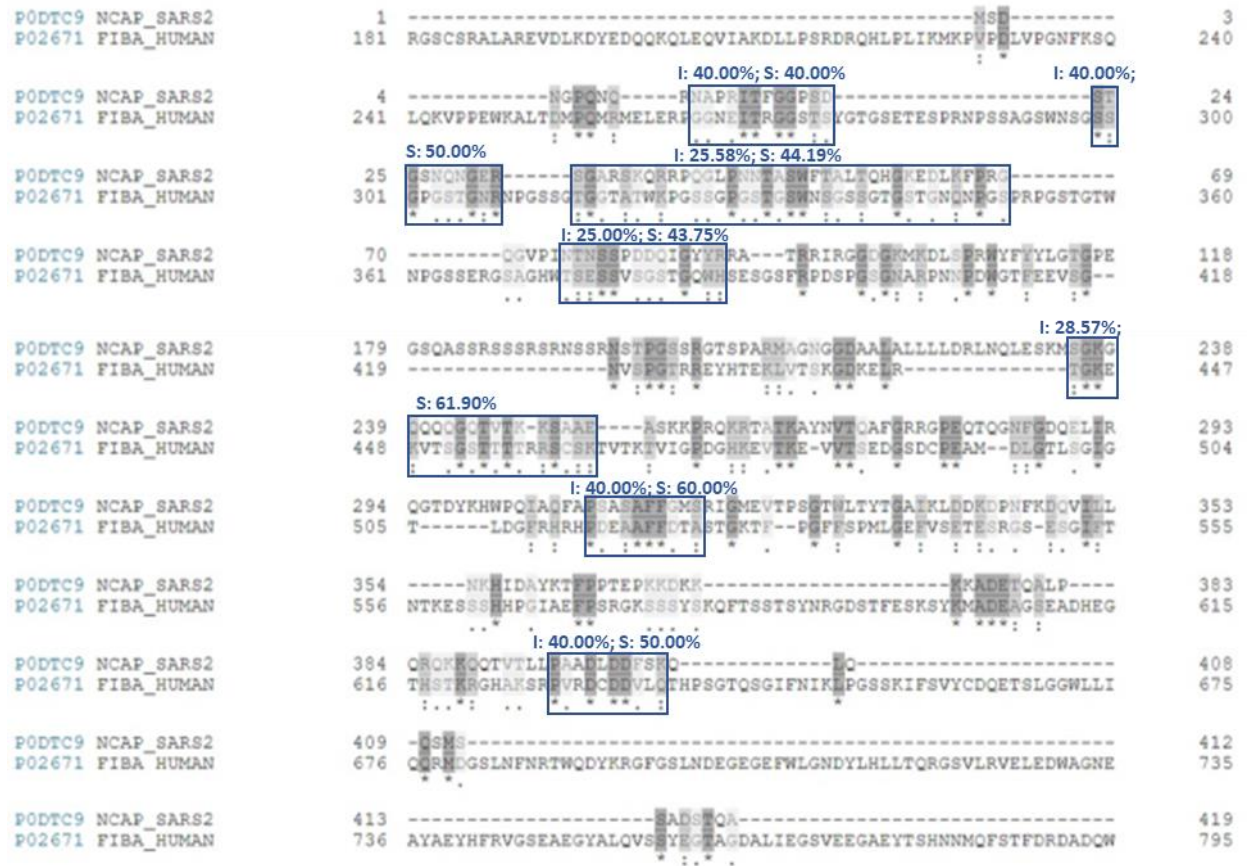

**Figure S6.** The sequence alignment of the SARS-Cov-2 N protein and human fibrinogen (Chain B)

I – Identity; S - Similarity

|                   |     |                                                               |     |
|-------------------|-----|---------------------------------------------------------------|-----|
| P0DTC9 NCAP_SARS2 | 1   | -----MSDNGPQNG                                                | 9   |
| P02675 FIBB_HUMAN | 1   | MKRMVSWSFHKLKTMKHLHLLLCVFLVKSQGVNDNEEGFFSARGHRPLDKKREEAPSLR   | 60  |
|                   |     | :::*.:                                                        |     |
| P0DTC9 NCAP_SARS2 | 10  | RNAPRITFGGPSDSTGSNQNGERSGARSQRRPQGLPNNTASWFTALTQHGKEDLK--FP   | 67  |
| P02675 FIBB_HUMAN | 61  | PAPPPISGGGYRARPAK-----AAATQKKVERKAPDAGG-C-----LHADFDLGVLCP    | 107 |
|                   |     | * *: ** .. * : : : : * : . *.. ** *                           |     |
| P0DTC9 NCAP_SARS2 | 68  | RGQ-----GVPINTN-----                                          | 77  |
| P02675 FIBB_HUMAN | 108 | TGCQLQEALLQQERPIRNSVDELNNNVEAVSQTSSTSSSQYMYLLKDLWQKQKQKQVDNEN | 167 |
|                   |     | * **..                                                        |     |
| P0DTC9 NCAP_SARS2 | 78  | -----SPDDQIGYYFRAT-----RRIRGGDG                               | 99  |
| P02675 FIBB_HUMAN | 228 | TVSCNIPFVVGKECEEIIRKGGTSEMYLIQPDSSVKPYFVYCDMNTENGWTVIQNRQD    | 287 |
|                   |     | .....*                                                        |     |
| P0DTC9 NCAP_SARS2 | 100 | KMKDLSFRWYFYLLGTGPEAGLPYGANK---DGIWVATEGALNTPKDHIGTRNPANNAA   | 156 |
| P02675 FIBB_HUMAN | 288 | GSVDFGRKWDPFYKQGFENVATNTDGKNYCGLPGEYWLGNDK-----ISQLTRMGPT     | 339 |
|                   |     | *.: * * * * * * * * * * * * : : * . . :                       |     |
| P0DTC9 NCAP_SARS2 | 157 | IVLQLP--QGTTLPKGFYAEGSRGGSQASSRSSRSRNSRSTPGSSRGTSFARMAGNG     | 214 |
| P02675 FIBB_HUMAN | 340 | LLIEMEDWKGDKV-----KAHYGGFTVQNEANK-----YQISVNKYRGTA            | 379 |
|                   |     | : : : : * : . : . * * . . . . . *                             |     |
| P0DTC9 NCAP_SARS2 | 215 | GDAALALLLLDRLNQLESKMSGKGQ---QQGQTV---TKKSAAEA                 | 268 |
| P02675 FIBB_HUMAN | 380 | GNA-----LMDGASQL---MGENRTMTIHNGMFFSTYDRDNDGWLTS               | 425 |
|                   |     | *:* *:* .** *: : : * : . : . . . . .                          |     |
| P0DTC9 NCAP_SARS2 | 269 | NVTQAFGRRGPEQTQGNFGDQELIRQGTDYKHWPQIAQ-FAPSASAFFG-----MSRIG   | 321 |
| P02675 FIBB_HUMAN | 426 | -----KEDGGGWYNRCHAANPNRGYYWGGQYTWDMAKHG                       | 460 |
|                   |     | : . * : : * . . : * * : *                                     |     |
| P0DTC9 NCAP_SARS2 | 322 | MEVTHSGTWLTYTGR                                               | 381 |
| P02675 FIBB_HUMAN | 461 | --TDIGVVWMNWKGSWYSMR-----KMSMKIRPFFFPQQ-----                  | 491 |
|                   |     | . . . * : : : *                                               |     |

I: 40.00%; S: 50.00%

I: 36.36%; S: 54.55%

I: 27.27%; S: 54.55%



I – Identity; S - Similarity

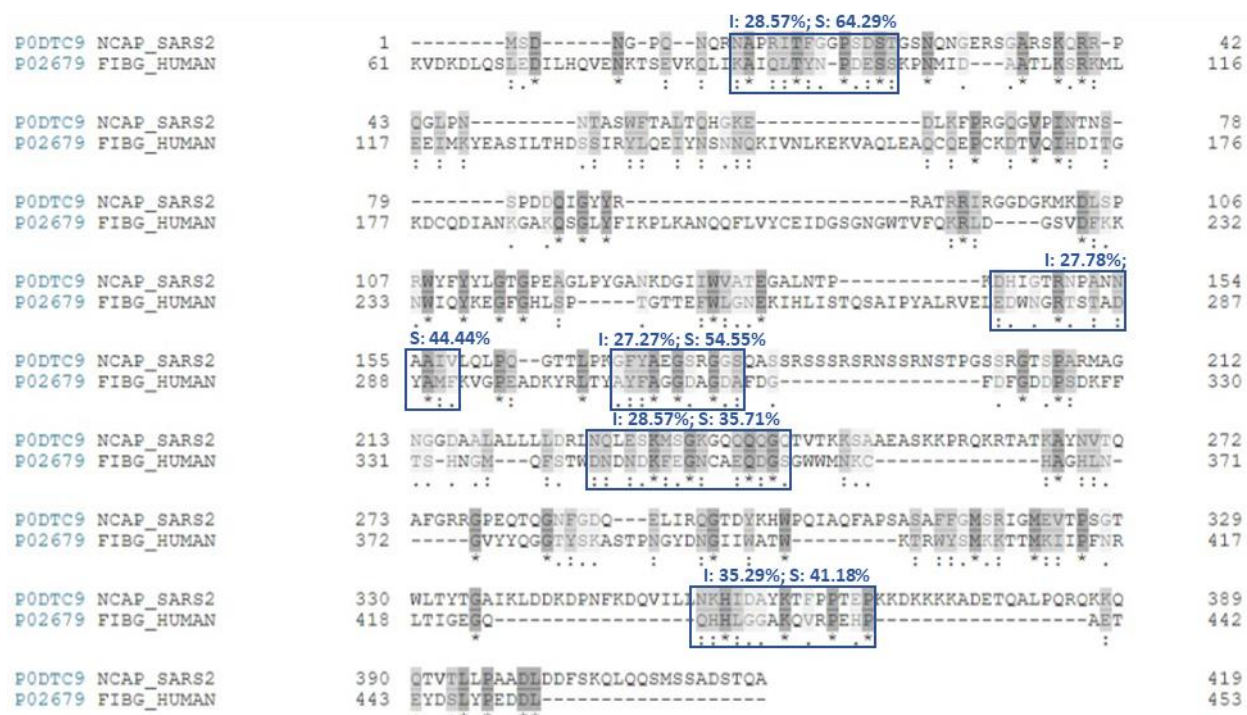

**Figure S8.** The sequence alignment of the SARS-Cov-2 S protein and human prothrombin

I – Identity; S - Similarity

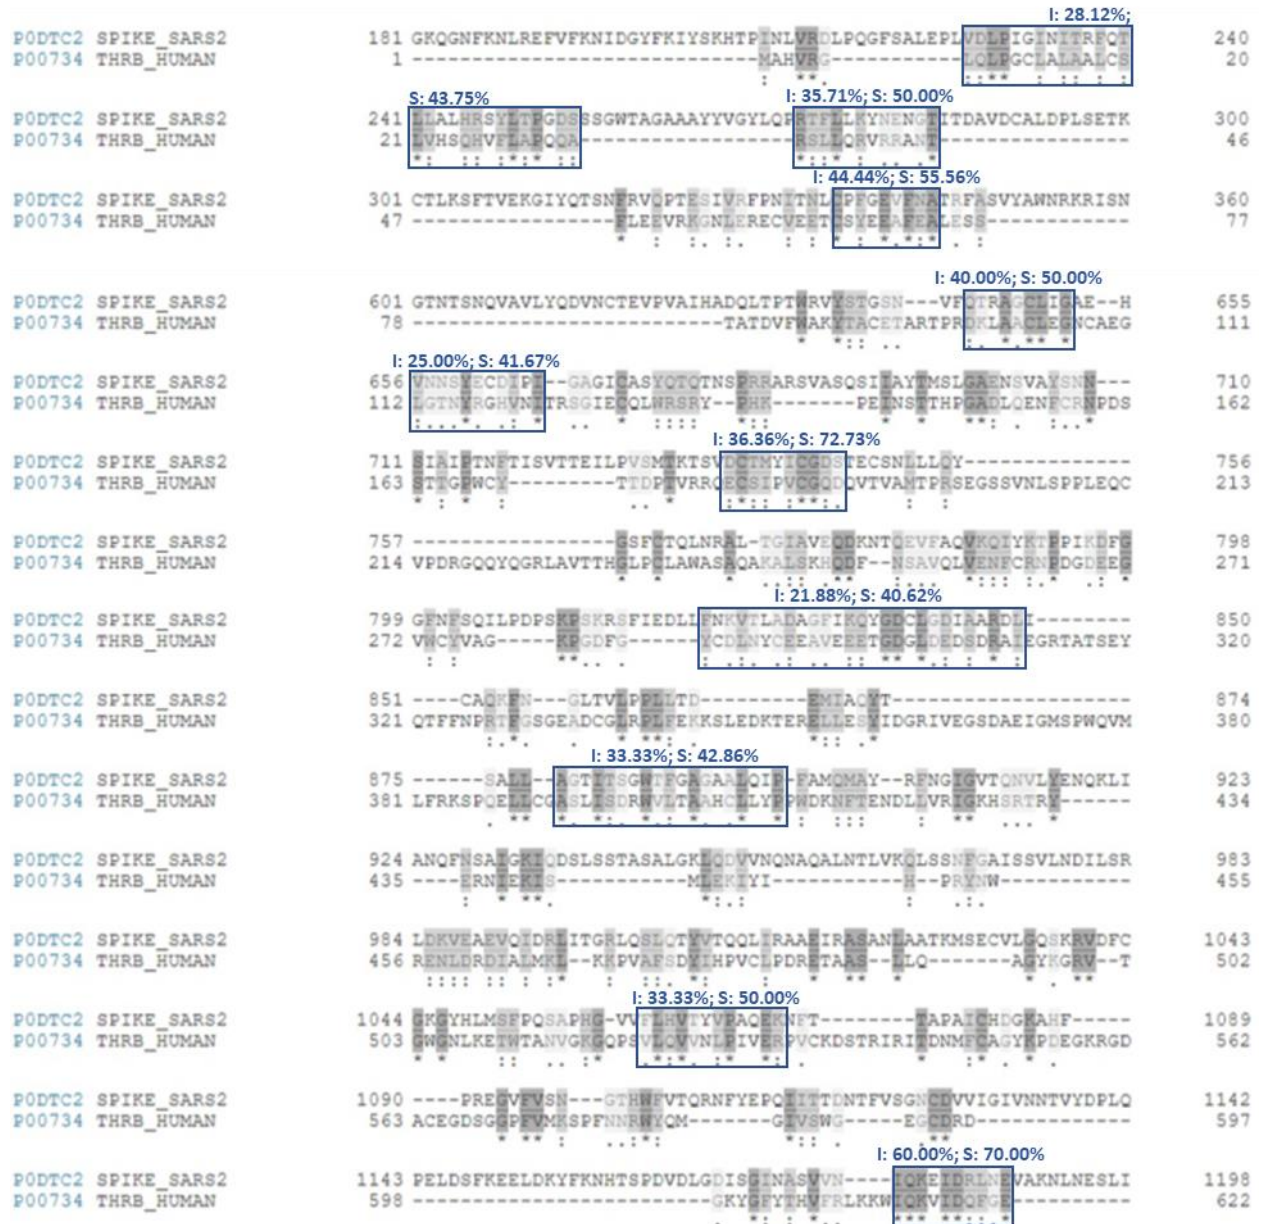

**Figure S9.** The sequence alignment of the SARS-Cov-2 N protein and human prothrombin

I – Identity; S - Similarity

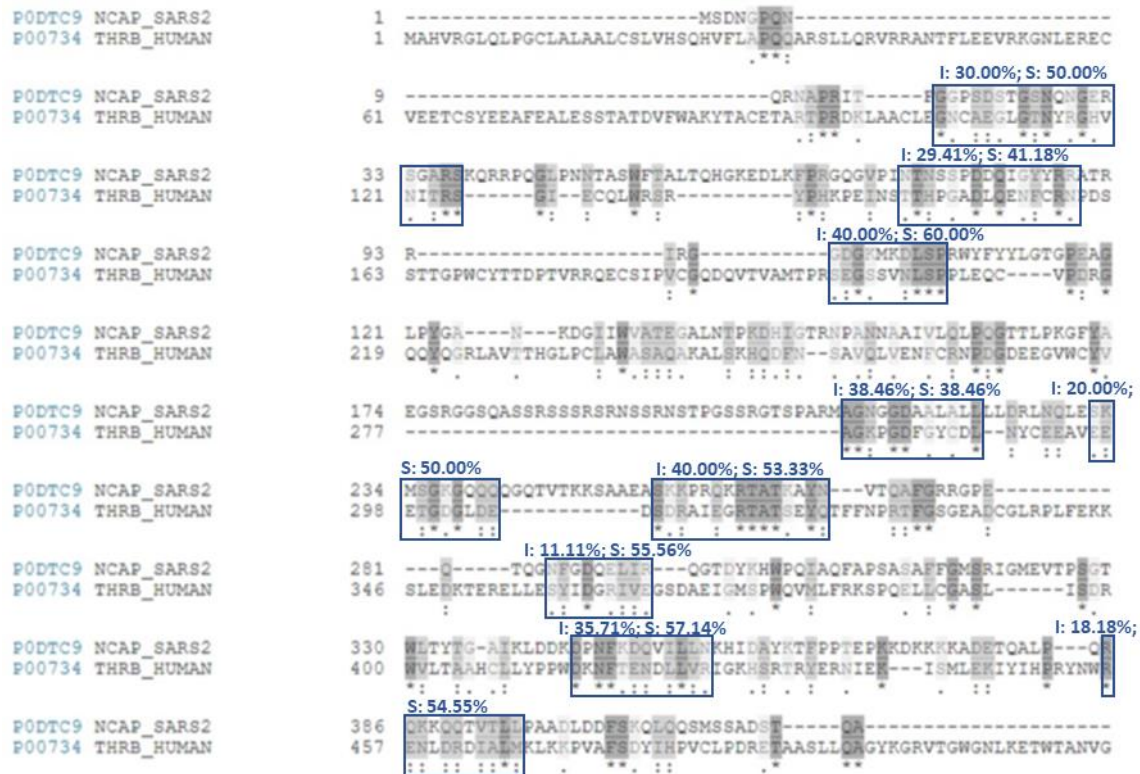

Supplement: s1 [file s1]
